# Supplementary material for: Chromatin Accessibility and Transcriptional Landscape during Inhibition of Salmonella enterica by Lactobacillus reuteri in IPEC-J2 Cells
Source: MDPI journal article supplement (doi:10.3390/cells12060968), 2023-03-22
Supplement: s1 [file s1]

**Table S1. Details of primers and antibodies**

| <b>GENE</b>        | <b>Sequence (5'→3')</b>                                             | <b>Product length (bp)</b> |
|--------------------|---------------------------------------------------------------------|----------------------------|
| HILA               | F: 5'-TCCACGCAGGAAATAACAGG-3'<br>R: 5'-TGGGCAACCAGCACTAACG-3'       | 203                        |
| INV1               | F: 5'- GGCGATCCTTGAACAAATAGC -3'<br>R: 5'- CGGCGAACAATAGACTGCTT -3' | 145                        |
| 16S                | F: 5'- GGCGATCCTTGAACAAATAGC -3'<br>R: 5'- CGGCGAACAATAGACTGCTT -3' | 180                        |
| UBTD2              | F: 5'-TTGTGCCGCCTTGAGATA-3'<br>R: 5'-TTGCAGGAAGAATACTGATTTA-3'      | 286                        |
| LRRC39             | F: 5'- CTATGCCTCAGTGACGTG-3'<br>R: 5'- TCTGCCAAAGTGGTTATG -3'       | 248                        |
| GRIK4              | F: 5'- AGTGCTGCTATGAATGGT-3'<br>R: 5'- GTGTTGGCAAAGATGTGG-3'        | 198                        |
| ENSSSCG00000014143 | F: 5'- CCAGCACCTAAACGACTT-3'<br>R: 5'- ATGCTTTGGTTTTATGGC-3'        | 277                        |
| ARNTL2             | F: 5'- ACTGGGCCGTATGATAGT -3'<br>R: 5'- AGATGCTGGAAGGGTGTA -3'      | 132                        |
| PIK3R1             | F: 5'- AGCCAAGGAAACTCTCGCA -3'<br>R: 5'- CATTCACTTCTTCCCTCGAGAT -3' | 245                        |
| <b>Antibodies</b>  | <b>Source</b>                                                       | <b>Application</b>         |
| PI3KR1             | HUABIO                                                              | WB                         |
| P-AKT              | Abcam                                                               | WB                         |
| AKT                | Abcam                                                               | WB                         |
| P-JNK              | Abcam                                                               | WB                         |
| JNK                | Abcam                                                               | WB                         |
| P-ERK              | Abcam                                                               | WB                         |
| ERK                | Abcam                                                               | WB                         |
| Cyclin D1          | HUABIO                                                              | WB                         |
| CDK4               | HUABIO                                                              | WB                         |
| BCL-2              | HUABIO                                                              | WB                         |
| BAX                | HUABIO                                                              | WB                         |
| HSP90              | HUABIO                                                              | WB                         |
